# Supplementary material
Source: PubMed Central journal article supplement (PMC7656168)
Supplement: mmc1.pdf [file mmc1.pdf]

# **Engineering a Novel Subunit Vaccine against SARS-CoV-2 by Exploring Immunoinformatics Approach**

Bishajit Sarkar<sup>1,2</sup>, Md. Asad Ullah<sup>1,2</sup>, Yusha Araf<sup>1,3</sup>, Mohammad Shahedur Rahman<sup>1,2\*</sup>

<sup>1</sup>COVID Research Cell (CRC), Wazed Miah Science Research Centre (WMSRC), Jahangirnagar University, Savar, Dhaka, Bangladesh

<sup>2</sup>Department of Biotechnology and Genetic Engineering, Faculty of Biological Sciences, Jahangirnagar University, Savar, Dhaka, Bangladesh

<sup>3</sup>Department of Genetic Engineering and Biotechnology, School of Life Sciences, Shahjalal University of Science and Technology, Sylhet, Bangladesh

\*For correspondence:

Professor Dr. Mohammad Shahedur Rahman,

Deputy Director

Wazed Miah Science Research Centre, Jahangirnagar University,

Savar, Dhaka-1342, Bangladesh.

Email: [rahmanms@juniv.edu](mailto:rahmanms@juniv.edu)

## Supplementary Information

### Tables

**Supplementary Table S1.** Prediction of MHC class-I and MHC class-II epitopes of Spike Glycoprotein, and their topology, antigenicity, allergenicity, toxicity, conservancy, and human homology analyses. AN; antigenicity, AG; allergenicity, HH; human homology, CN; conservancy, NA; not allowed.

| MHC classes | Epitopes    | AN          | AG           | Toxicity    | HH          | CN            | IFN-gamma inducing capability | IL-4 inducing capability | IL-10 inducing capability |
|-------------|-------------|-------------|--------------|-------------|-------------|---------------|-------------------------------|--------------------------|---------------------------|
| MHC class-I | NSFTRGVVY   | Non-Antigen | Allergen     | Non-toxic   | Non-homolog | Conserved     | NA                            | NA                       | NA                        |
|             | STQDLFLPF   | Antigen     | Allergen     | Non-toxic   | Non-homolog | Conserved     | NA                            | NA                       | NA                        |
|             | VLPFNDGVY   | Antigen     | Non-allergen | Non-toxic   | Non-homolog | Conserved     | NA                            | NA                       | NA                        |
|             | CNDPFLGVY   | Antigen     | Allergen     | Non-toxic   | Non-homolog | Conserved     | NA                            | NA                       | NA                        |
|             | WMESEFRVY   | Non-Antigen | Allergen     | Non-toxic   | Non-homolog | Non-conserved | NA                            | NA                       | NA                        |
|             | YSSANNCTF   | Non-Antigen | Non-allergen | Non-toxic   | Non-homolog | Conserved     | NA                            | NA                       | NA                        |
|             | SANNCTFEY   | Non-Antigen | Non-allergen | Non-toxic   | Non-homolog | Conserved     | NA                            | NA                       | NA                        |
|             | FVFKNIDGY   | Non-Antigen | Allergen     | Non-toxic   | Non-homolog | Conserved     | NA                            | NA                       | NA                        |
|             | NIDGYFKIY   | Non-Antigen | Allergen     | Non-toxic   | Non-homolog | Non-conserved | NA                            | NA                       | NA                        |
|             | WTAGAAAYY   | Antigen     | Non-allergen | Non-toxic   | Non-homolog | Conserved     | NA                            | NA                       | NA                        |
|             | GAAAYYVGY   | Antigen     | Non-allergen | Non-toxic   | Non-homolog | Conserved     | NA                            | NA                       | NA                        |
|             | ITDAVDCAL   | Antigen     | Allergen     | Non-toxic   | Non-homolog | Non-conserved | NA                            | NA                       | NA                        |
|             | LSETKCTLK   | Antigen     | Allergen     | Non-toxic   | Non-homolog | Conserved     | NA                            | NA                       | NA                        |
|             | NATRFASVY   | Non-Antigen | Allergen     | Non-toxic   | Non-homolog | Conserved     | NA                            | NA                       | NA                        |
|             | RISNCVADY   | Non-Antigen | Non-allergen | Non-toxic   | Non-homolog | Non-conserved | NA                            | NA                       | NA                        |
|             | CVADYSVLY   | Non-Antigen | Allergen     | Non-toxic   | Non-homolog | Conserved     | NA                            | NA                       | NA                        |
|             | NSASFSTFK   | Non-Antigen | Allergen     | Non-toxic   | Non-homolog | Conserved     | NA                            | NA                       | NA                        |
|             | ASFSTFKCY   | Non-Antigen | Non-allergen | Non-toxic   | Non-homolog | Non-conserved | NA                            | NA                       | NA                        |
| FTNVYADSF   | Non-Antigen | Allergen    | Non-toxic    | Non-homolog | Conserved   | NA            | NA                            | NA                       |                           |

|              |                   |             |              |           |             |               |             |             |             |
|--------------|-------------------|-------------|--------------|-----------|-------------|---------------|-------------|-------------|-------------|
|              | VGGNYNYLY         | Antigen     | Allergen     | Non-toxic | Non-homolog | Non-conserved | NA          | NA          | NA          |
|              | ERDISTEILY        | Non-Antigen | Allergen     | Non-toxic | Non-homolog | Non-conserved | NA          | NA          | NA          |
|              | TSNQVAVLY         | Antigen     | Allergen     | Non-toxic | Non-homolog | Non-conserved | NA          | NA          | NA          |
|              | YQDVNCTEV         | Antigen     | Allergen     | Non-toxic | Non-homolog | Conserved     | NA          | NA          | NA          |
|              | QLTPTWRVY         | Antigen     | Non-allergen | Non-toxic | Non-homolog | Conserved     | NA          | NA          | NA          |
|              | GAEHVNNSY         | Antigen     | Allergen     | Non-toxic | Non-homolog | Conserved     | NA          | NA          | NA          |
|              | VASQSIIAY         | Non-Antigen | Allergen     | Non-toxic | Non-homolog | Non-conserved | NA          | NA          | NA          |
|              | KTSVDCTMY         | Antigen     | Non-allergen | Non-toxic | Non-homolog | Non-conserved | NA          | NA          | NA          |
|              | STECNLLL          | Antigen     | Non-allergen | Non-toxic | Non-homolog | Conserved     | NA          | NA          | NA          |
|              | ECSNLLQY          | Non-Antigen | Allergen     | Non-toxic | Non-homolog | Conserved     | NA          | NA          | NA          |
|              | RSFIEDLLF         | Antigen     | Non-allergen | Non-toxic | Non-homolog | Conserved     | NA          | NA          | NA          |
|              | LTDEMQY           | Non-Antigen | Non-allergen | Non-toxic | Non-homolog | Non-conserved | NA          | NA          | NA          |
|              | GTITSGWTF         | Non-Antigen | Allergen     | Non-toxic | Non-homolog | Conserved     | NA          | NA          | NA          |
|              | RVDFCGKGY         | Non-Antigen | Allergen     | Non-toxic | Non-homolog | Non-conserved | NA          | NA          | NA          |
|              | FVSNQTHWF         | Antigen     | Non-allergen | Non-toxic | Non-homolog | Non-conserved | NA          | NA          | NA          |
|              | VSNQTHWFV         | Non-Antigen | Allergen     | Non-toxic | Non-homolog | Non-conserved | NA          | NA          | NA          |
|              | MTSCCCLK          | Antigen     | Non-allergen | Non-toxic | Non-homolog | Non-conserved | NA          | NA          | NA          |
|              | VLKGVKLHY         | Antigen     | Non-allergen | Non-toxic | Non-homolog | Conserved     | NA          | NA          | NA          |
| MHC class-II | KTQSLIVNNAITNVV   | Antigen     | Allergen     | Non-toxic | Non-homolog | Non-conserved | Non-inducer | Non-inducer | Non-inducer |
|              | LLIVNNAITNVVIVKVC | Non-Antigen | Non-allergen | Non-toxic | Non-homolog | Conserved     | Inducer     | Non-inducer | Non-inducer |
|              | QSLIVNNAITNVVIVK  | Antigen     | Non-allergen | Non-toxic | Non-homolog | Conserved     | Non-inducer | Non-inducer | Non-inducer |
|              | SLIVNNAITNVVIVK   | Antigen     | Allergen     | Non-toxic | Non-homolog | Conserved     | Non-inducer | Non-inducer | Non-inducer |
|              | TQSLIVNNAITNVVI   | Antigen     | Allergen     | Non-toxic | Non-homolog | Non-conserved | Non-inducer | Non-inducer | Non-inducer |
|              | LIVNNAITNVVIVKVC  | Non-Antigen | Allergen     | Non-toxic | Non-homolog | Non-conserved | Non-inducer | Inducer     | Non-inducer |
|              | LSFELLHAPATVCGP   | Antigen     | Allergen     | Non-toxic | Non-homolog | Non-conserved | Inducer     | Inducer     | Non-inducer |
|              | SKTQSLIVNNAITNV   | Non-Antigen | Allergen     | Non-toxic | Non-homolog | Conserved     | Non-inducer | Non-inducer | Inducer     |
|              | VLSFELLHAPATVCG   | Antigen     | Non-allergen | Non-toxic | Non-homolog | Conserved     | Inducer     | Inducer     | Inducer     |
|              | VVLSFELLHAPATVC   | Antigen     | Non-allergen | Non-toxic | Non-homolog | Conserved     | Inducer     | Inducer     | Inducer     |

**Supplementary Table S2.** Prediction of MHC class-I and MHC class-II epitopes of Nucleocapsid phosphoprotein, and their topology, antigenicity, allergenicity, toxicity, conservancy, and human homology analyses. AN; antigenicity, AG; allergenicity, HH; human homology, CN; conservancy, NA; not allowed.

| MHC classes  | Epitopes        | AN          | AG           | Toxicity  | HH          | CN            | IFN-gamma inducing capability | IL-4 inducing capability | IL-10 inducing capability |
|--------------|-----------------|-------------|--------------|-----------|-------------|---------------|-------------------------------|--------------------------|---------------------------|
| MHC class-I  | NTASWFTAL       | Non-Antigen | Non-allergen | Non-toxic | Non-homolog | Conserved     | NA                            | NA                       | NA                        |
|              | SSPDDQIGY       | Antigen     | Non-allergen | Non-toxic | Non-homolog | Conserved     | NA                            | NA                       | NA                        |
|              | SPDDQIGYY       | Antigen     | Non-allergen | Non-toxic | Non-homolog | Conserved     | NA                            | NA                       | NA                        |
|              | MKDLSPRWY       | Antigen     | Allergen     | Non-toxic | Non-homolog | Conserved     | NA                            | NA                       | NA                        |
|              | DLSPRWYFY       | Antigen     | Non-allergen | Non-toxic | Non-homolog | Conserved     | NA                            | NA                       | NA                        |
|              | LSPRWYFY        | Antigen     | Non-allergen | Non-toxic | Non-homolog | Conserved     | NA                            | NA                       | NA                        |
|              | GTTLPKGFY       | Non-Antigen | Allergen     | Non-toxic | Non-homolog | Conserved     | NA                            | NA                       | NA                        |
|              | GTDYKHWYQ       | Antigen     | Allergen     | Non-toxic | Non-homolog | Non-conserved | NA                            | NA                       | NA                        |
|              | LLNKHIDAY       | Non-Antigen | Allergen     | Non-toxic | Non-homolog | conserved     | NA                            | NA                       | NA                        |
| MHC class-II | AQFAPSASAFFGMSR | Non-Antigen | Non-allergen | Non-toxic | Non-homolog | Conserved     | Inducer                       | Inducer                  | Non-inducer               |
|              | IAQFAPSASAFFGMS | Antigen     | Non-allergen | Non-toxic | Non-homolog | Conserved     | Inducer                       | Non-inducer              | Non-inducer               |
|              | PQIAQFAPSASAFFG | Non-Antigen | Non-allergen | Non-toxic | Non-homolog | Non-conserved | Inducer                       | Non-inducer              | Inducer                   |
|              | QIAQFAPSASAFFGM | Non-Antigen | Non-allergen | Non-toxic | Non-homolog | Non-conserved | Inducer                       | Inducer                  | Inducer                   |
|              | WPQIAQFAPSASAFF | Antigen     | Non-allergen | Non-toxic | Non-homolog | Non-conserved | Inducer                       | Inducer                  | Inducer                   |
|              | NPANNAIIVLQLPQG | Non-Antigen | Non-allergen | Non-toxic | Non-homolog | Non-conserved | Non-inducer                   | Non-inducer              | Non-inducer               |
|              | PANNAIIVLQLPQGT | Non-Antigen | Non-allergen | Non-toxic | Non-homolog | Conserved     | Inducer                       | Non-inducer              | Non-inducer               |
|              | RNPANNAIIVLQLPQ | Non-Antigen | Non-allergen | Non-toxic | Non-homolog | Conserved     | Non-inducer                   | Non-inducer              | Non-inducer               |
|              | TRNPANNAIIVLQLP | Non-Antigen | Non-allergen | Non-toxic | Non-homolog | Non-conserved | Non-inducer                   | Non-inducer              | Non-inducer               |
|              | GTRNPANNAIIVLQL | Antigen     | Non-allergen | Non-toxic | Non-homolog | Conserved     | Inducer                       | Non-inducer              | Non-inducer               |

**Supplementary Table S3.** Prediction of MHC class-I and MHC class-II epitopes of Membrane Glycoprotein, and their topology, antigenicity, allergenicity, toxicity, conservancy, and human homology analyses. AN; antigenicity, AG; allergenicity, HH; human homology, CN; conservancy, NA; not allowed.

| MHC class       | Epitopes         | AN           | AG           | Toxicity    | HH          | CN          | IFN-gamma inducing capability | IL-4 inducing capability | IL-10 inducing capability |
|-----------------|------------------|--------------|--------------|-------------|-------------|-------------|-------------------------------|--------------------------|---------------------------|
| MHC class-I     | LLEQWNLVI        | Non-Antigen  | Non-allergen | Non-toxic   | Non-homolog | Conserved   | NA                            | NA                       | NA                        |
|                 | WICLLQFAY        | Antigen      | Allergen     | Non-toxic   | Non-homolog | Conserved   | NA                            | NA                       | NA                        |
|                 | YANRNRFLY        | Non-Antigen  | Allergen     | Non-toxic   | Non-homolog | Conserved   | NA                            | NA                       | NA                        |
|                 | LVGLMWLSY        | Antigen      | Non-allergen | Non-toxic   | Non-homolog | Conserved   | NA                            | NA                       | NA                        |
|                 | VATSRTLSTY       | Antigen      | Allergen     | Non-toxic   | Non-homolog | Conserved   | NA                            | NA                       | NA                        |
|                 | ATSRTLSTYY       | Antigen      | Non-allergen | Non-toxic   | Non-homolog | Conserved   | NA                            | NA                       | NA                        |
|                 | AGDSGFAAY        | Antigen      | Non-allergen | Non-toxic   | Non-homolog | Conserved   | NA                            | NA                       | NA                        |
|                 | YSRYRIGNY        | Non-Antigen  | Allergen     | Non-toxic   | Non-homolog | Conserved   | NA                            | NA                       | NA                        |
|                 | SSSDNIALL        | Non-Antigen  | Allergen     | Non-toxic   | Non-homolog | Conserved   | NA                            | NA                       | NA                        |
| SSDNIALLV       | Non-Antigen      | Allergen     | Non-toxic    | Non-homolog | Conserved   | NA          | NA                            | NA                       |                           |
| MHC class-II    | GLMWLSYFIASFRLF  | Non-Antigen  | Non-allergen | Non-toxic   | Non-homolog | Conserved   | Non-inducer                   | Non-inducer              | Non-inducer               |
|                 | LMWLSYFIASFRLFA  | Non-Antigen  | Non-allergen | Non-toxic   | Non-homolog | Conserved   | Non-inducer                   | Non-inducer              | Non-inducer               |
|                 | LSYYKLGASQRVAGD  | Non-Antigen  | Allergen     | Non-toxic   | Non-homolog | Conserved   | Non-inducer                   | Non-inducer              | Non-inducer               |
|                 | RTLSYYKLGASQRVA  | Antigen      | Allergen     | Non-toxic   | Non-homolog | Conserved   | Inducer                       | Inducer                  | Non-inducer               |
|                 | IKLIFLWLLWPVTLA  | Antigen      | Non-allergen | Non-toxic   | Non-homolog | Conserved   | Inducer                       | Inducer                  | Non-inducer               |
|                 | SRTLSTYYKLGASQRV | Antigen      | Allergen     | Non-toxic   | Non-homolog | Conserved   | Inducer                       | Inducer                  | Non-inducer               |
|                 | TLSYYKLGASQRVAG  | Antigen      | Allergen     | Non-toxic   | Non-homolog | Conserved   | Non-inducer                   | Inducer                  | Non-inducer               |
|                 | VGLMWLSYFIASFRL  | Antigen      | Non-allergen | Non-toxic   | Non-homolog | Conserved   | Non-inducer                   | Non-inducer              | Inducer                   |
|                 | MWLSYFIASFRLFAR  | Non-Antigen  | Allergen     | Non-toxic   | Non-homolog | Conserved   | Non-inducer                   | Non-inducer              | Inducer                   |
| KLIFLWLLWPVTLAC | Antigen          | Non-allergen | Non-toxic    | Non-homolog | Conserved   | Non-inducer | Non-inducer                   | Inducer                  |                           |

**Supplementary Table S4.** Prediction of MHC class-I and MHC class-II epitopes of Envelope Protein, and their topology, antigenicity, allergenicity, toxicity, conservancy, and human homology analyses. AN; antigenicity, AG; allergenicity, HH; human homology, CN; conservancy, NA; not allowed.

| MHC classes  | Epitopes        | AN          | AG           | Toxicity  | HH          | CN        | IFN-gamma inducing capability | IL-4 inducing capability | IL-10 inducing capability |
|--------------|-----------------|-------------|--------------|-----------|-------------|-----------|-------------------------------|--------------------------|---------------------------|
| MHC class-I  | LTALRLCAY       | Non-Antigen | Non-allergen | Non-toxic | Non-homolog | Conserved | NA                            | NA                       | NA                        |
|              | VSLVKPSFY       | Antigen     | Non-allergen | Non-toxic | Non-homolog | Conserved | NA                            | NA                       | NA                        |
|              | LVKPSFYVY       | Antigen     | Allergen     | Non-toxic | Non-homolog | Conserved | NA                            | NA                       | NA                        |
| MHC class-II | LLFLAFVVFLVTLA  | Antigen     | Non-allergen | Non-toxic | Non-homolog | Conserved | Non-inducer                   | Non-inducer              | Inducer                   |
|              | VLLFLAFVVFLVTL  | Antigen     | Non-allergen | Non-toxic | Non-homolog | Conserved | Non-inducer                   | Non-inducer              | Inducer                   |
|              | LFLAFVVFLVTLAI  | Antigen     | Non-allergen | Non-toxic | Non-homolog | Conserved | Non-inducer                   | Non-inducer              | Inducer                   |
|              | AFVVFLVTLAILTA  | Antigen     | Non-allergen | Non-toxic | Non-homolog | Conserved | Non-inducer                   | Non-inducer              | Inducer                   |
|              | VNSVLLFLAFVVFL  | Antigen     | Non-allergen | Non-toxic | Non-homolog | Conserved | Non-inducer                   | Non-inducer              | Inducer                   |
|              | NSVLLFLAFVVFLV  | Antigen     | Non-allergen | Non-toxic | Non-homolog | Conserved | Non-inducer                   | Non-inducer              | Inducer                   |
|              | SVLLFLAFVVFLVLT | Antigen     | Non-allergen | Non-toxic | Non-homolog | Conserved | Non-inducer                   | Non-inducer              | Inducer                   |
|              | FLLVTLAILTALRLC | Antigen     | Non-allergen | Non-toxic | Non-homolog | Conserved | Non-inducer                   | Non-inducer              | Inducer                   |
|              | FLAFVVFLVTLAIL  | Antigen     | Non-allergen | Non-toxic | Non-homolog | Conserved | Non-inducer                   | Non-inducer              | Inducer                   |
|              | LAFVVFLVTLAILT  | Antigen     | Non-allergen | Non-toxic | Non-homolog | Conserved | Non-inducer                   | Non-inducer              | Inducer                   |

**Supplementary Table S5.** List of the four selected proteins from different SARS-CoV-2 isolates of different countries around the world for the conservancy analysis.

| <b>Country</b> | <b>Spike glycoprotein<br/>(GenBank accession<br/>number)</b> | <b>Nucleocapsid<br/>phosphoprotein<br/>(GenBank accession<br/>number)</b> | <b>Membrane<br/>Glycoprotein<br/>(GenBank accession<br/>number)</b> | <b>Envelope Protein<br/>(GenBank accession<br/>number)</b> |
|----------------|--------------------------------------------------------------|---------------------------------------------------------------------------|---------------------------------------------------------------------|------------------------------------------------------------|
| Australia      | QOT47622.1                                                   | QOT47618.1                                                                | QLG75212                                                            | QLG75187                                                   |
| India          | QLF97939.1                                                   | QKG91282.1                                                                | QLF98110                                                            | QLF98097                                                   |
| South Korea    | QLD99677.1                                                   | QIV15004.1                                                                | QLA46615                                                            | QIV15010                                                   |
| China          | QLG69199.1                                                   | QKI36837.1                                                                | QKI36832                                                            | QKI36843                                                   |
| Italy          | QLB38609.1                                                   | QKE43723.1                                                                | QKE43718                                                            | QKE43705                                                   |
| Japan          | BCI48738.1                                                   | BCI50552.1                                                                | BCI48796                                                            | BCI48806                                                   |
| New Zealand    | QLC90935.1                                                   | QLC90943.1                                                                | QLC90938                                                            | QLC90937                                                   |
| Morocco        | QLE00003.1                                                   | QLE10676.1                                                                | QLE10924                                                            | QLE10670                                                   |
| France         | QLD29172.1                                                   | QJT72118.1                                                                | QJT72125                                                            | QJT72112                                                   |
| Spain          | QKX47197.1                                                   | QKX47229.1                                                                | QKJ68403                                                            | QKJ68402                                                   |
| USA            | QLF99990.1                                                   | QLG00047.1                                                                | QLF95259                                                            | QLG00029                                                   |
| Brazil         | QLF80216.1                                                   | QLD32036.1                                                                | QJA41644                                                            | QLD32030                                                   |
| Egypt          | QKS74794.1                                                   | QKT20962.1                                                                | QKT20981                                                            | QKT21004                                                   |
| Poland         | QLF78309.1                                                   | QJZ28151.1                                                                | QJZ28170                                                            | QJZ28277                                                   |
| Chile          | QKY74786.1                                                   | QKY74842.1                                                                | QKY74873                                                            | QKY74824                                                   |

**Supplementary Table S6.** Results of the secondary structure analysis of the vaccine construct.

| Vaccines | Secondary structure elements | PRISPRED | GOR IV | SOPMA  | SIMPA96 |
|----------|------------------------------|----------|--------|--------|---------|
| CV       | $\alpha$ -helix              | 22.34%   | 24.63% | 27.29% | 21.59%  |
|          | $\beta$ -strand              | 36.67%   | 32.28% | 34.44% | 32.72%  |
|          | Coil structure               | 40.97%   | 43.09% | 38.27% | 45.51%  |

**Supplementary Table S7.** The list of the predicted conformational B-cell epitopes of the vaccine, CV with their scores.

| Residues                                                                                                                                                                                                                                                                                                                                                                                                                                                                                                                                                                                                                                                                                                                                                                                                                                                                                                                                                                                                                                                                                                                                           | Number of residues | Score | Figure                                                                                |
|----------------------------------------------------------------------------------------------------------------------------------------------------------------------------------------------------------------------------------------------------------------------------------------------------------------------------------------------------------------------------------------------------------------------------------------------------------------------------------------------------------------------------------------------------------------------------------------------------------------------------------------------------------------------------------------------------------------------------------------------------------------------------------------------------------------------------------------------------------------------------------------------------------------------------------------------------------------------------------------------------------------------------------------------------------------------------------------------------------------------------------------------------|--------------------|-------|---------------------------------------------------------------------------------------|
| E1, A2, A3, A4, K5, G6, I7, I8, N9, T10, _L11, Q12, K13, Y14, Y15, C16, R17, V18, R19, G20, G21, R22, C23, A24, V25, L26, S27, C28, L29, P30, K31, E32, E33, Q34, I35, G36, K37, C38, S39, T40, R41, G42, R43, K44, C45, C46, R47, R48, K49, K50, E51, A52, K55, L508, A509, F510, V511, V512, F513, L514, L515, V516, G517, P518, G519, P520, G521, S522, G537, P538, G539, P540, G541, V542, L543, L544, F545, L546, A547, F548, V549, F551, L552, L553, T555, L556, G557, P558, G559, P560, G561, F562, L563, A564, F565, V566, V567, F568, L569, L570, V571, T572, L573, A574, I575, L576, G577, P578, G579, P580, V590, T591, L592, A593, I594, L595, T596, G597, P598, G599, P600, G601                                                                                                                                                                                                                                                                                                                                                                                                                                                      | 122                | 0.774 | 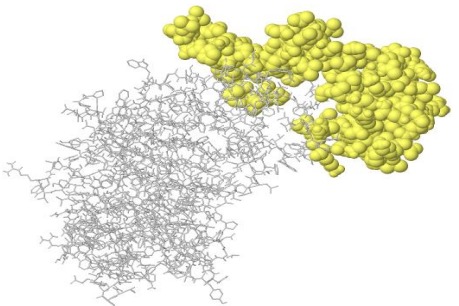  |
| A98, A99, Y100, Y101, V102, G103, Y104, A105, A106, Y107, Q108, L109, T110, P111, T112, W113, Y131, V132, L133, K134, G135, V136, K137, H139, Y140, A141, A142, Y143, S144, S145, P146, D147, D148, Q149, D158, D159, Q160, I161, G162, Y163, Y164, A165, A166, Y167, D168, L169, S170, P171, R172, W173, Y174, S181, P182, R183, W184, F186, Y188, A189, A190, Y191, L192, V193, G194, L195, M196, W197, L198, S199, Y200, A201, A202, Y203, A204, T205, S206, R207, T208, L209, S210, Y211, Y212, A213, A214, Y215, A216, G217, D218, S219, G220, F221, A222, K232, P233, S234, F235, Y236, G237, P238, G239, P240, G241, V247, N248, N249, A250, N252, K256, G257, P258, G259, P260, G261, V262, L263, S264, F265, E266, L267, L268, H269, A270, P271, A272, T273, V274, C275, G276, G277, P278, G279, P280, G281, V282, V283, L284, S285, F286, E287, L288, L289, H290, P307, S308, A309, S310, A311, M315, S316, G317, P318, G319, P320, G321, G322, T323, N325, P326, A327, N328, N329, A330, A331, I332, V333, L334, Q335, L336, G337, P338, G339, P340, G341, I342, K343, L344, I345, S368, F370, G377, P378, G379, P380, G381, K382, L383 | 185                | 0.668 |  |



|                                                                                                                         |           |              |                                                                                     |
|-------------------------------------------------------------------------------------------------------------------------|-----------|--------------|-------------------------------------------------------------------------------------|
| <p>L367, P391, V392, T393, L394, A395, G397, P398, G399, A416, G417, P418, G419, P420, G421, V422, L423, L424, F425</p> | <p>19</p> | <p>0.597</p> | 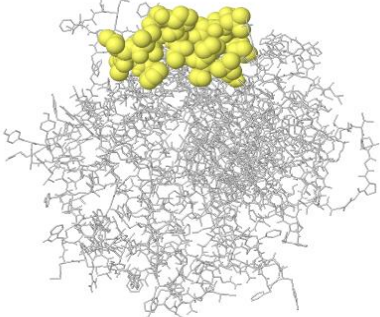 |
| <p>V488, F489, L490</p>                                                                                                 | <p>03</p> | <p>0.537</p> |  |

## Figures

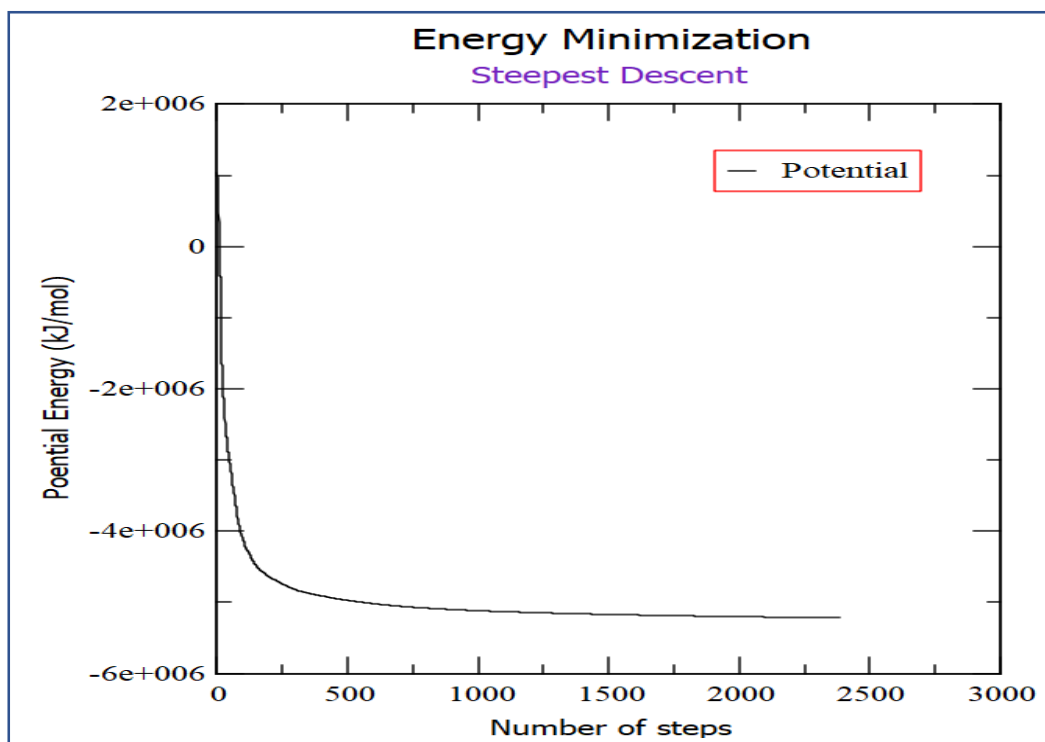

**Supplementary Figure S1.** Potential Energy of the docked complex calculated at the steepest descent.







| *****                             |                                                          | *****                            |                                                          |
|-----------------------------------|----------------------------------------------------------|----------------------------------|----------------------------------------------------------|
| QLG75187.1                        | MYSFVSEETGLIVNSVLLFLAFVFLVTLAILTALRLCAYCCNIVNVSIVKPSFYVY | QLG75187.1                       | MYSFVSEETGLIVNSVLLFLAFVFLVTLAILTALRLCAYCCNIVNVSIVKPSFYVY |
| QLF98097.1                        | MYSFVSEETGLIVNSVLLFLAFVFLVTLAILTALRLCAYCCNIVNVSIVKPSFYVY | QLF98097.1                       | MYSFVSEETGLIVNSVLLFLAFVFLVTLAILTALRLCAYCCNIVNVSIVKPSFYVY |
| QIV15010.1                        | MYSFVSEETGLIVNSVLLFLAFVFLVTLAILTALRLCAYCCNIVNVSIVKPSFYVY | QIV15010.1                       | MYSFVSEETGLIVNSVLLFLAFVFLVTLAILTALRLCAYCCNIVNVSIVKPSFYVY |
| QKI36843.1                        | MYSFVSEETGLIVNSVLLFLAFVFLVTLAILTALRLCAYCCNIVNVSIVKPSFYVY | QKI36843.1                       | MYSFVSEETGLIVNSVLLFLAFVFLVTLAILTALRLCAYCCNIVNVSIVKPSFYVY |
| QKE43705.1                        | MYSFVSEETGLIVNSVLLFLAFVFLVTLAILTALRLCAYCCNIVNVSIVKPSFYVY | QKE43705.1                       | MYSFVSEETGLIVNSVLLFLAFVFLVTLAILTALRLCAYCCNIVNVSIVKPSFYVY |
| BCI48806.1                        | MYSFVSEETGLIVNSVLLFLAFVFLVTLAILTALRLCAYCCNIVNVSIVKPSFYVY | BCI48806.1                       | MYSFVSEETGLIVNSVLLFLAFVFLVTLAILTALRLCAYCCNIVNVSIVKPSFYVY |
| QLC90937.1                        | MYSFVSEETGLIVNSVLLFLAFVFLVTLAILTALRLCAYCCNIVNVSIVKPSFYVY | QLC90937.1                       | MYSFVSEETGLIVNSVLLFLAFVFLVTLAILTALRLCAYCCNIVNVSIVKPSFYVY |
| QLE10670.1                        | MYSFVSEETGLIVNSVLLFLAFVFLVTLAILTALRLCAYCCNIVNVSIVKPSFYVY | QLE10670.1                       | MYSFVSEETGLIVNSVLLFLAFVFLVTLAILTALRLCAYCCNIVNVSIVKPSFYVY |
| QJT72112.1                        | MYSFVSEETGLIVNSVLLFLAFVFLVTLAILTALRLCAYCCNIVNVSIVKPSFYVY | QJT72112.1                       | MYSFVSEETGLIVNSVLLFLAFVFLVTLAILTALRLCAYCCNIVNVSIVKPSFYVY |
| QKJ68402.1                        | MYSFVSEETGLIVNSVLLFLAFVFLVTLAILTALRLCAYCCNIVNVSIVKPSFYVY | QKJ68402.1                       | MYSFVSEETGLIVNSVLLFLAFVFLVTLAILTALRLCAYCCNIVNVSIVKPSFYVY |
| QLG00029.1                        | MYSFVSEETGLIVNSVLLFLAFVFLVTLAILTALRLCAYCCNIVNVSIVKPSFYVY | QLG00029.1                       | MYSFVSEETGLIVNSVLLFLAFVFLVTLAILTALRLCAYCCNIVNVSIVKPSFYVY |
| QLD32030.1                        | MYSFVSEETGLIVNSVLLFLAFVFLVTLAILTALRLCAYCCNIVNVSIVKPSFYVY | QLD32030.1                       | MYSFVSEETGLIVNSVLLFLAFVFLVTLAILTALRLCAYCCNIVNVSIVKPSFYVY |
| QRT21004.1                        | MYSFVSEETGLIVNSVLLFLAFVFLVTLAILTALRLCAYCCNIVNVSIVKPSFYVY | QRT21004.1                       | MYSFVSEETGLIVNSVLLFLAFVFLVTLAILTALRLCAYCCNIVNVSIVKPSFYVY |
| QJZ28277.1                        | MYSFVSEETGLIVNSVLLFLAFVFLVTLAILTALRLCAYCCNIVNVSIVKPSFYVY | QJZ28277.1                       | MYSFVSEETGLIVNSVLLFLAFVFLVTLAILTALRLCAYCCNIVNVSIVKPSFYVY |
| tope-FLAFVFLVTLAILT               | -----FLAFVFLVTLAILT-----                                 | tope-LAFVFLVTLAILT               | -----LAFVFLVTLAILT-----                                  |
| QKY74824.1                        | MYSFVSEETGLIVNSVLLFLAFVFLVTLAILTALRLCAYCCNIVNVSIVKPSFYVY | QKY74824.1                       | MYSFVSEETGLIVNSVLLFLAFVFLVTLAILTALRLCAYCCNIVNVSIVKPSFYVY |
| FLAFVFLVTLAILT (Envelope Protein) |                                                          | LAFVFLVTLAILT (Envelope Protein) |                                                          |

**Supplementary Figure S2.** The result of the multiple sequence alignment analysis of the ‘most promising epitopes’ with the selected protein sequences from around the world, reflecting their 100% conservancy.

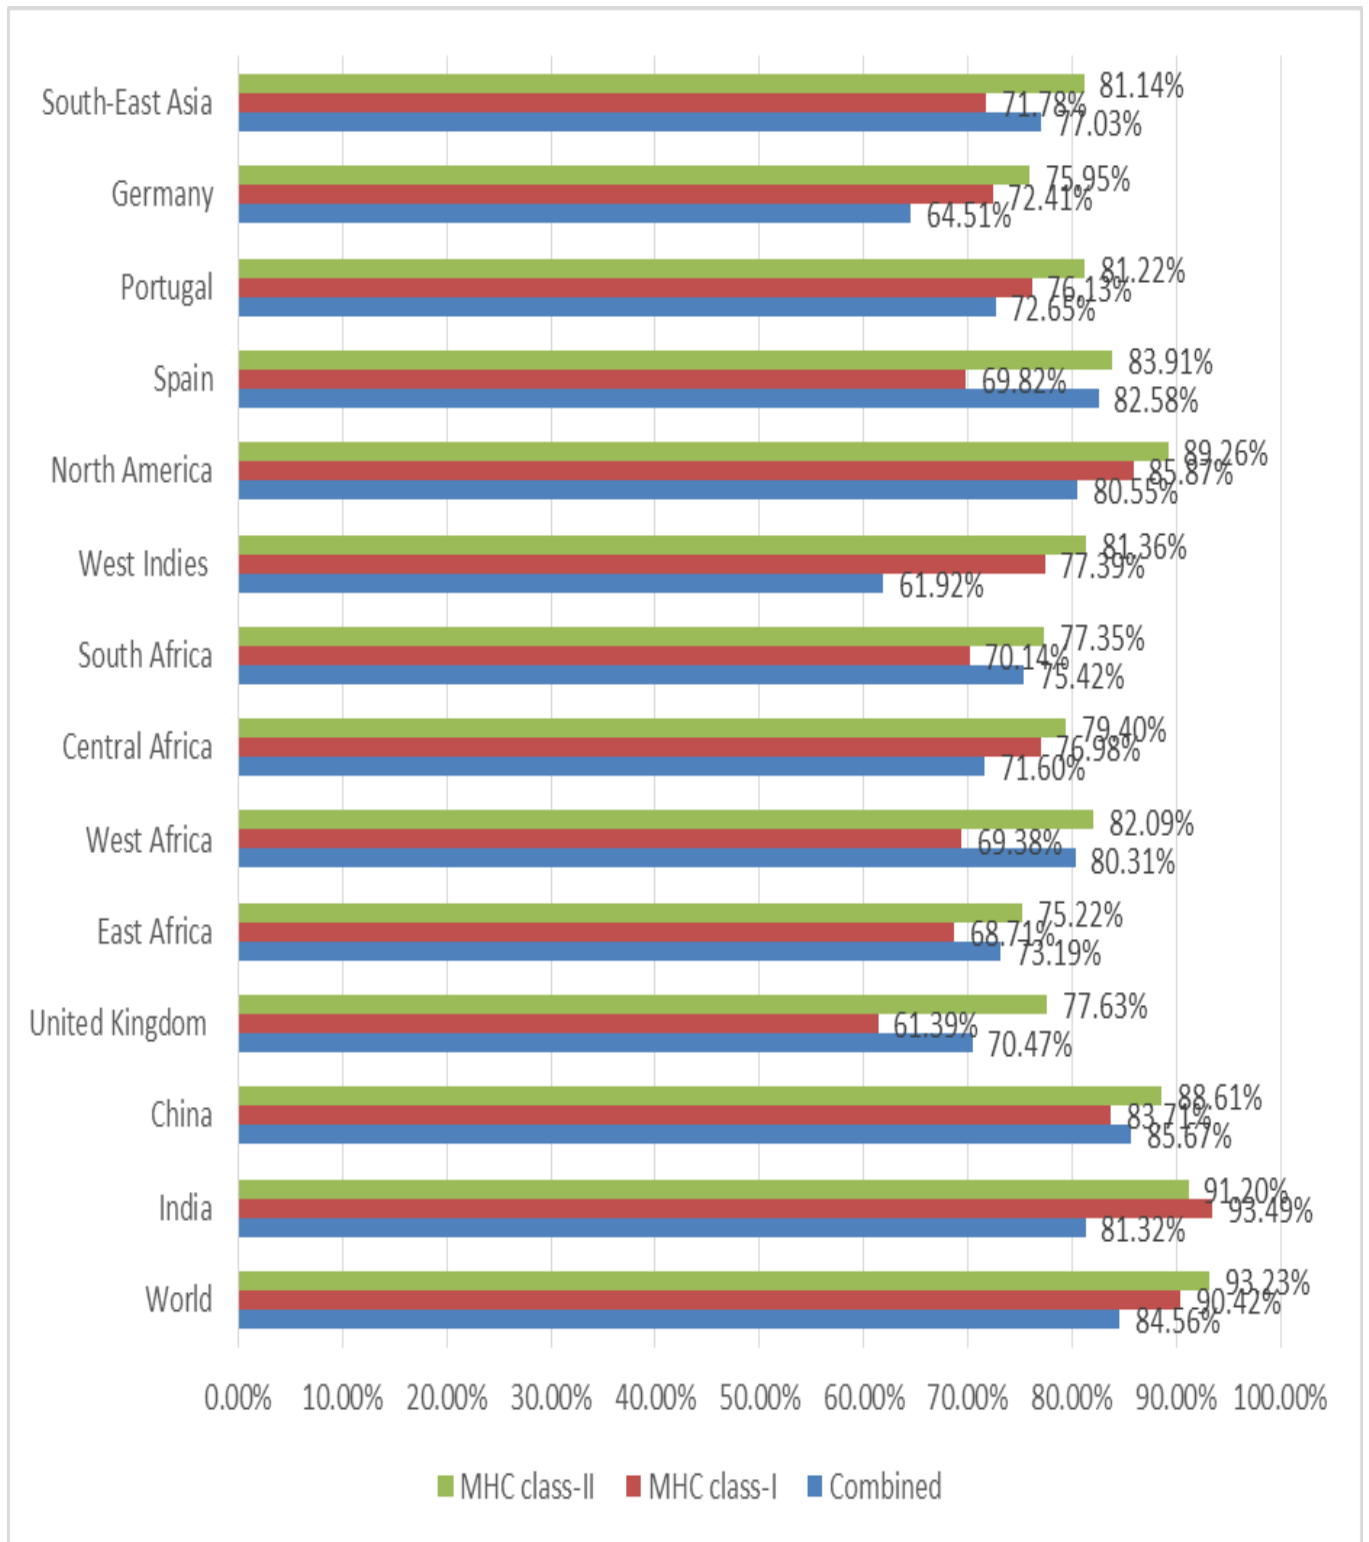

**Supplementary Figure S3.** The result of the population coverage analysis of the most promising epitopes and their selected MHC alleles.

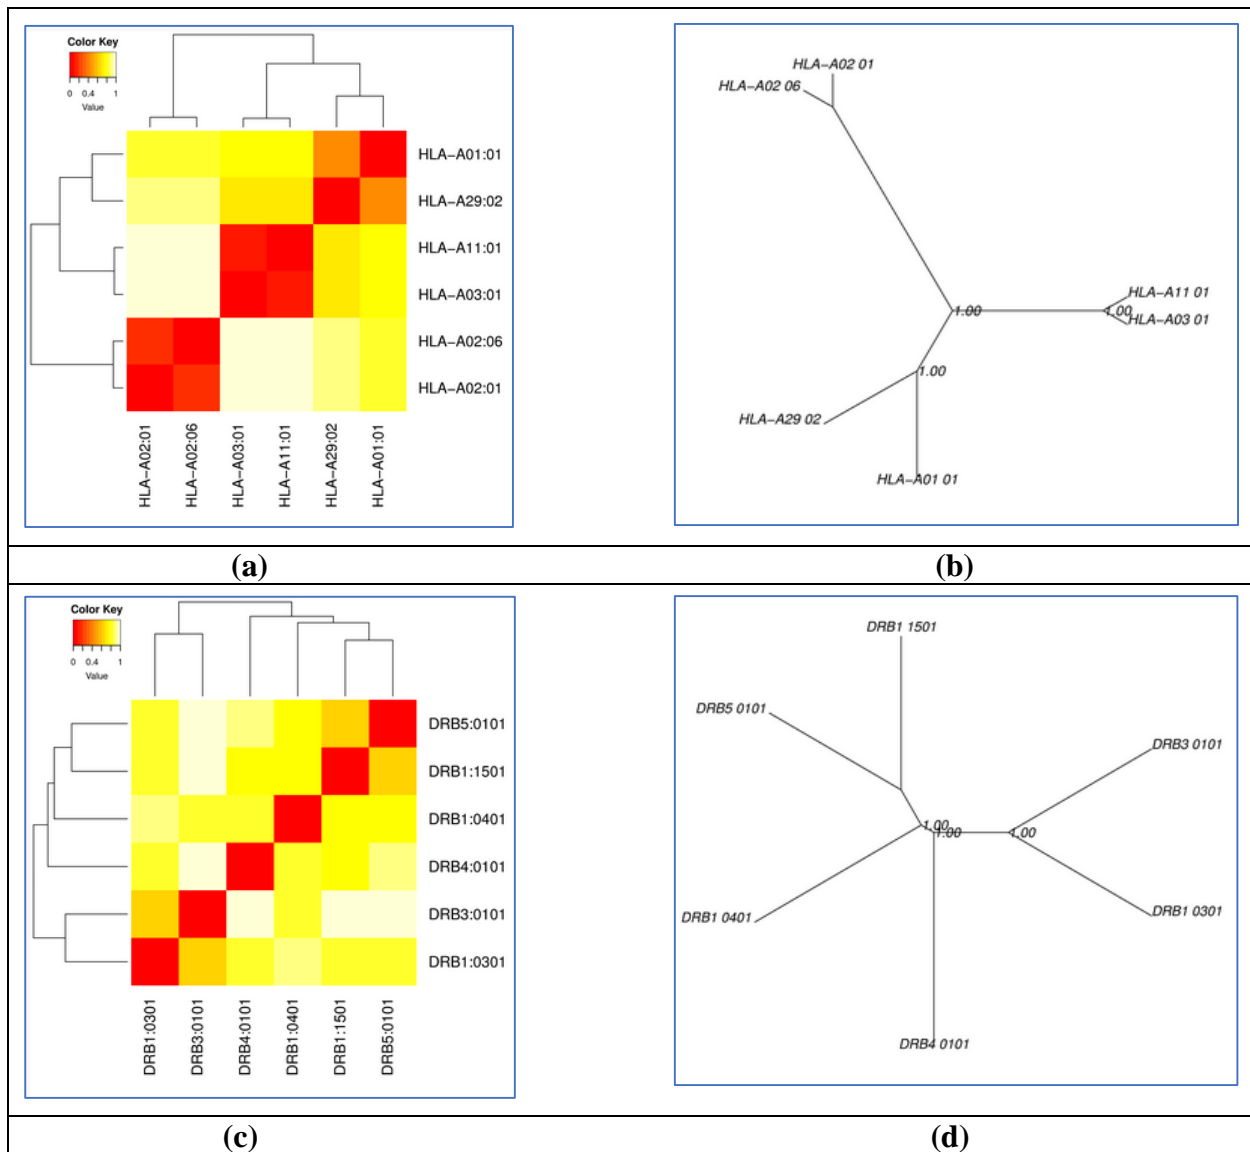

**Supplementary Figure S4.** The results of the MHC cluster analysis. Here, (a) is the heat map (left) and (b) is the tree map (right) of MHC class-I cluster analysis, (c) is the heat map (left) and (d) is the tree map (right) of MHC class-II cluster analysis.



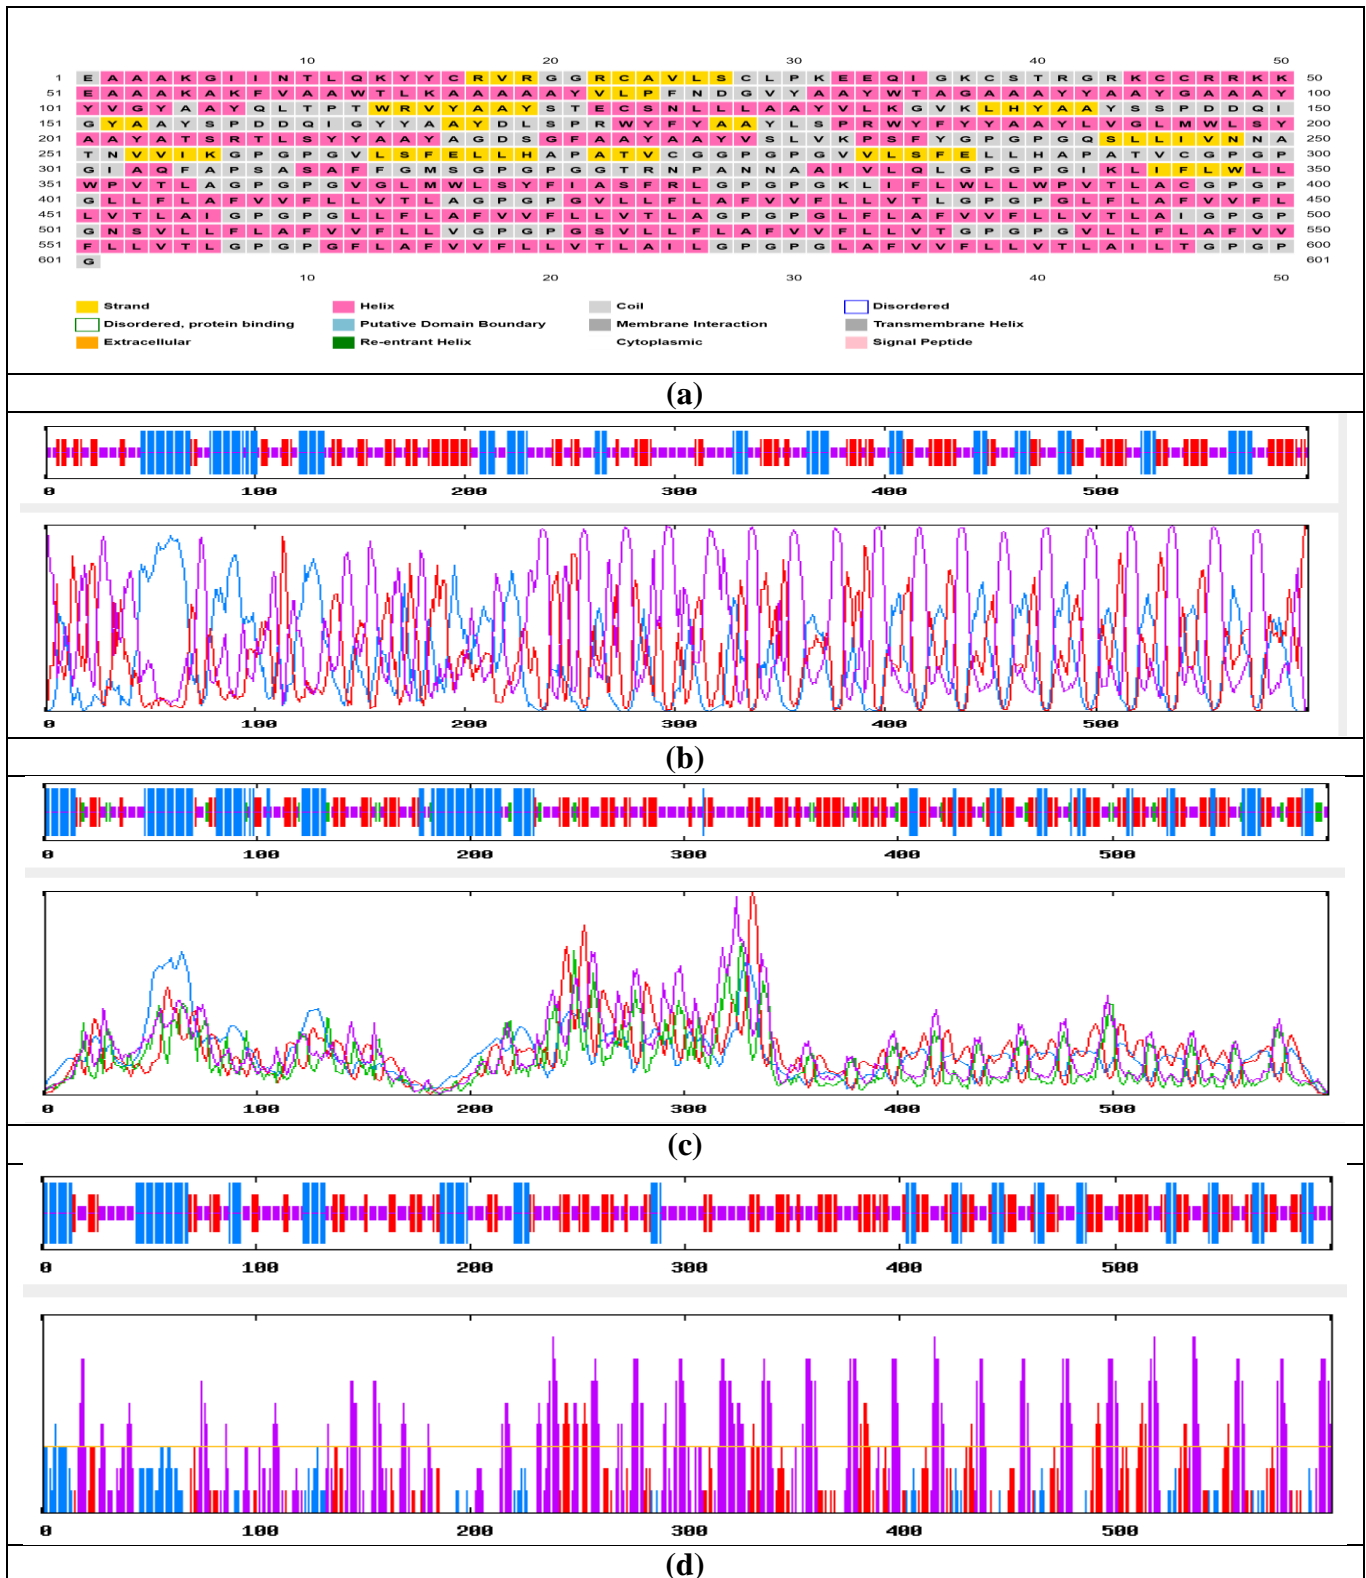

**Supplementary Figure S5.** The results of the secondary structure prediction of the constructed CV vaccine. (a) PRISPRED prediction, (b) GOR IV prediction, (c) SOPMA prediction, (d) SIMPA96 prediction.

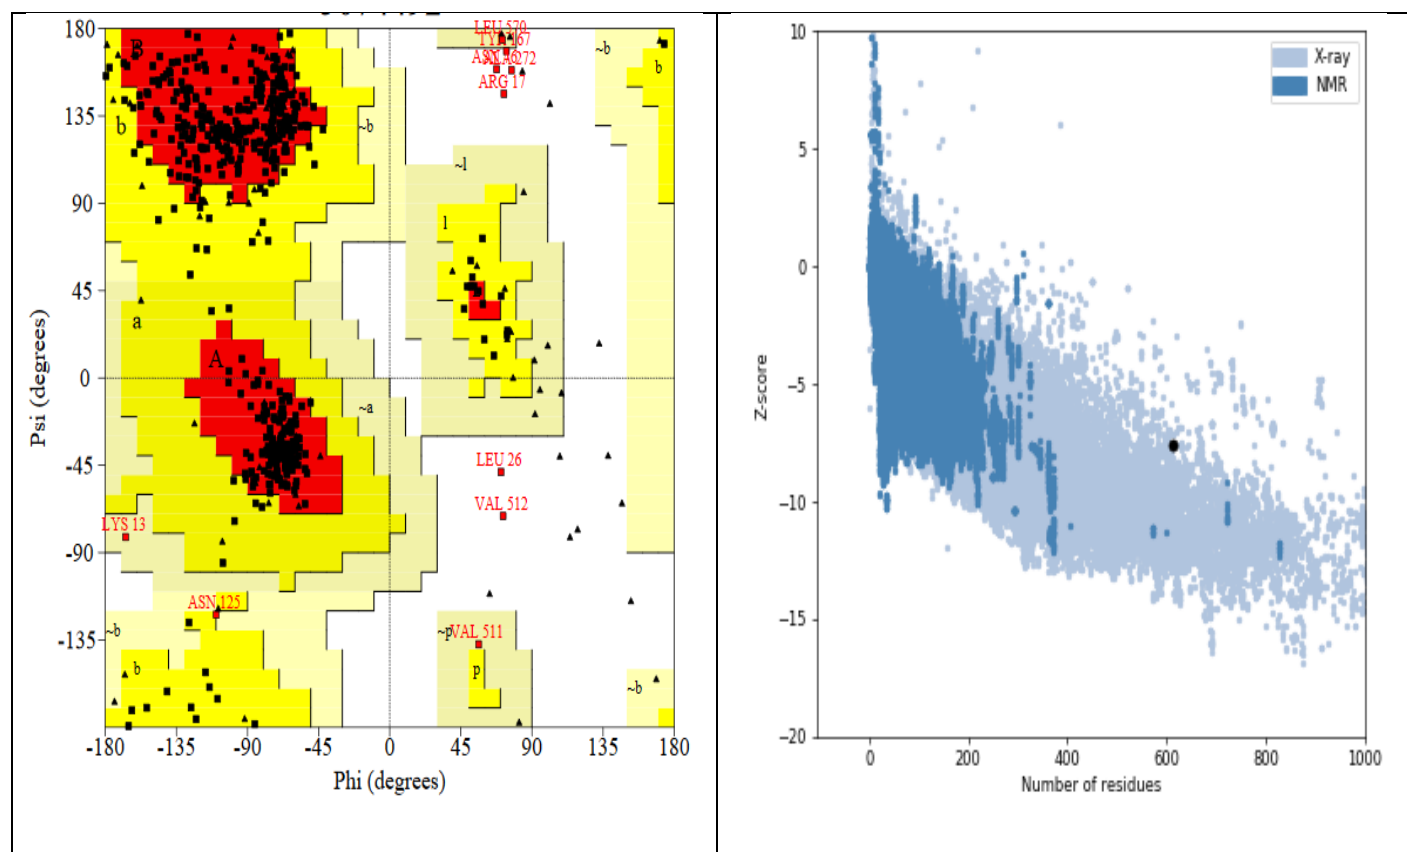

**Supplementary Figure S6.** The results of the Ramachandran plot analysis generated by PROCHECK server (left) and quality score or z-score graph (right) generated by the ProSA-web server of the refined vaccine construct, CV. In the Ramachandran plots, the orange and deep yellow colored regions are the allowed regions, the light yellow regions are the generously allowed regions and the white regions are the outlier regions and the glycine residues are represented as triangles. All the three vaccine constructs were predicted to have quite good structural quality.

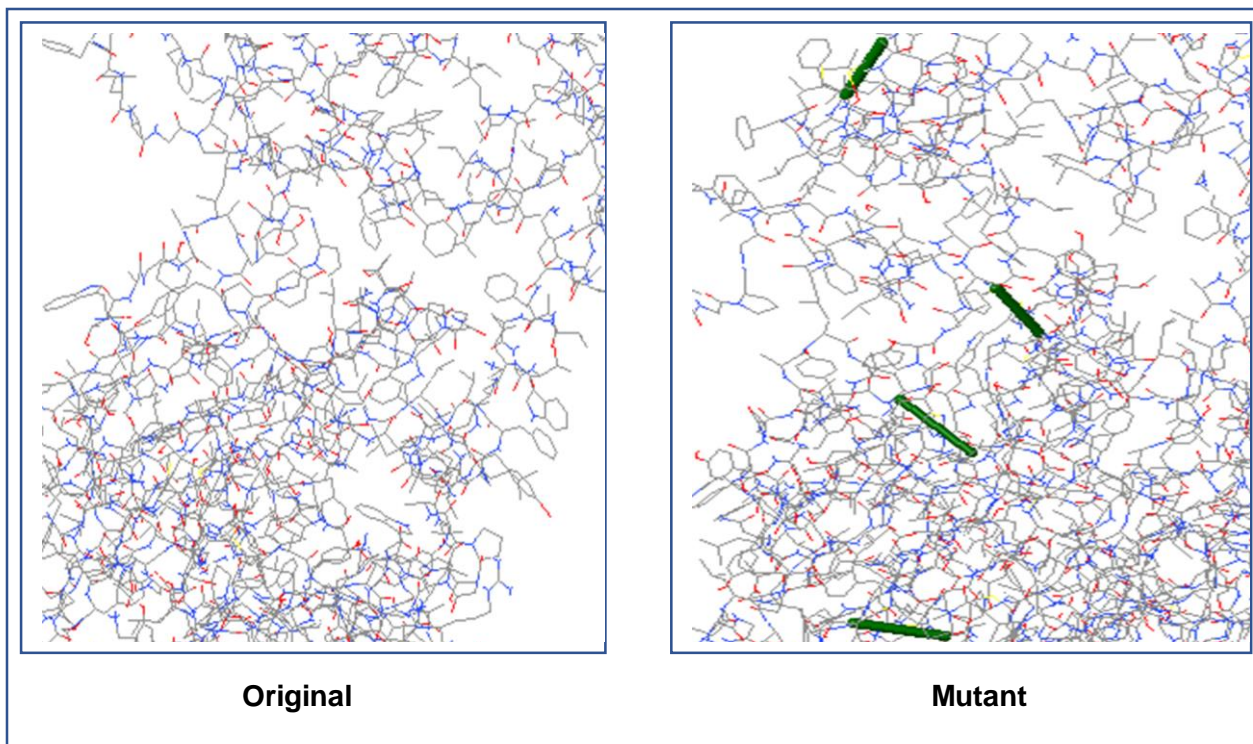

**Supplementary Figure S7.** The disulfide engineering of the vaccine construct, CV, both the original (left) and mutant (right) forms are shown.

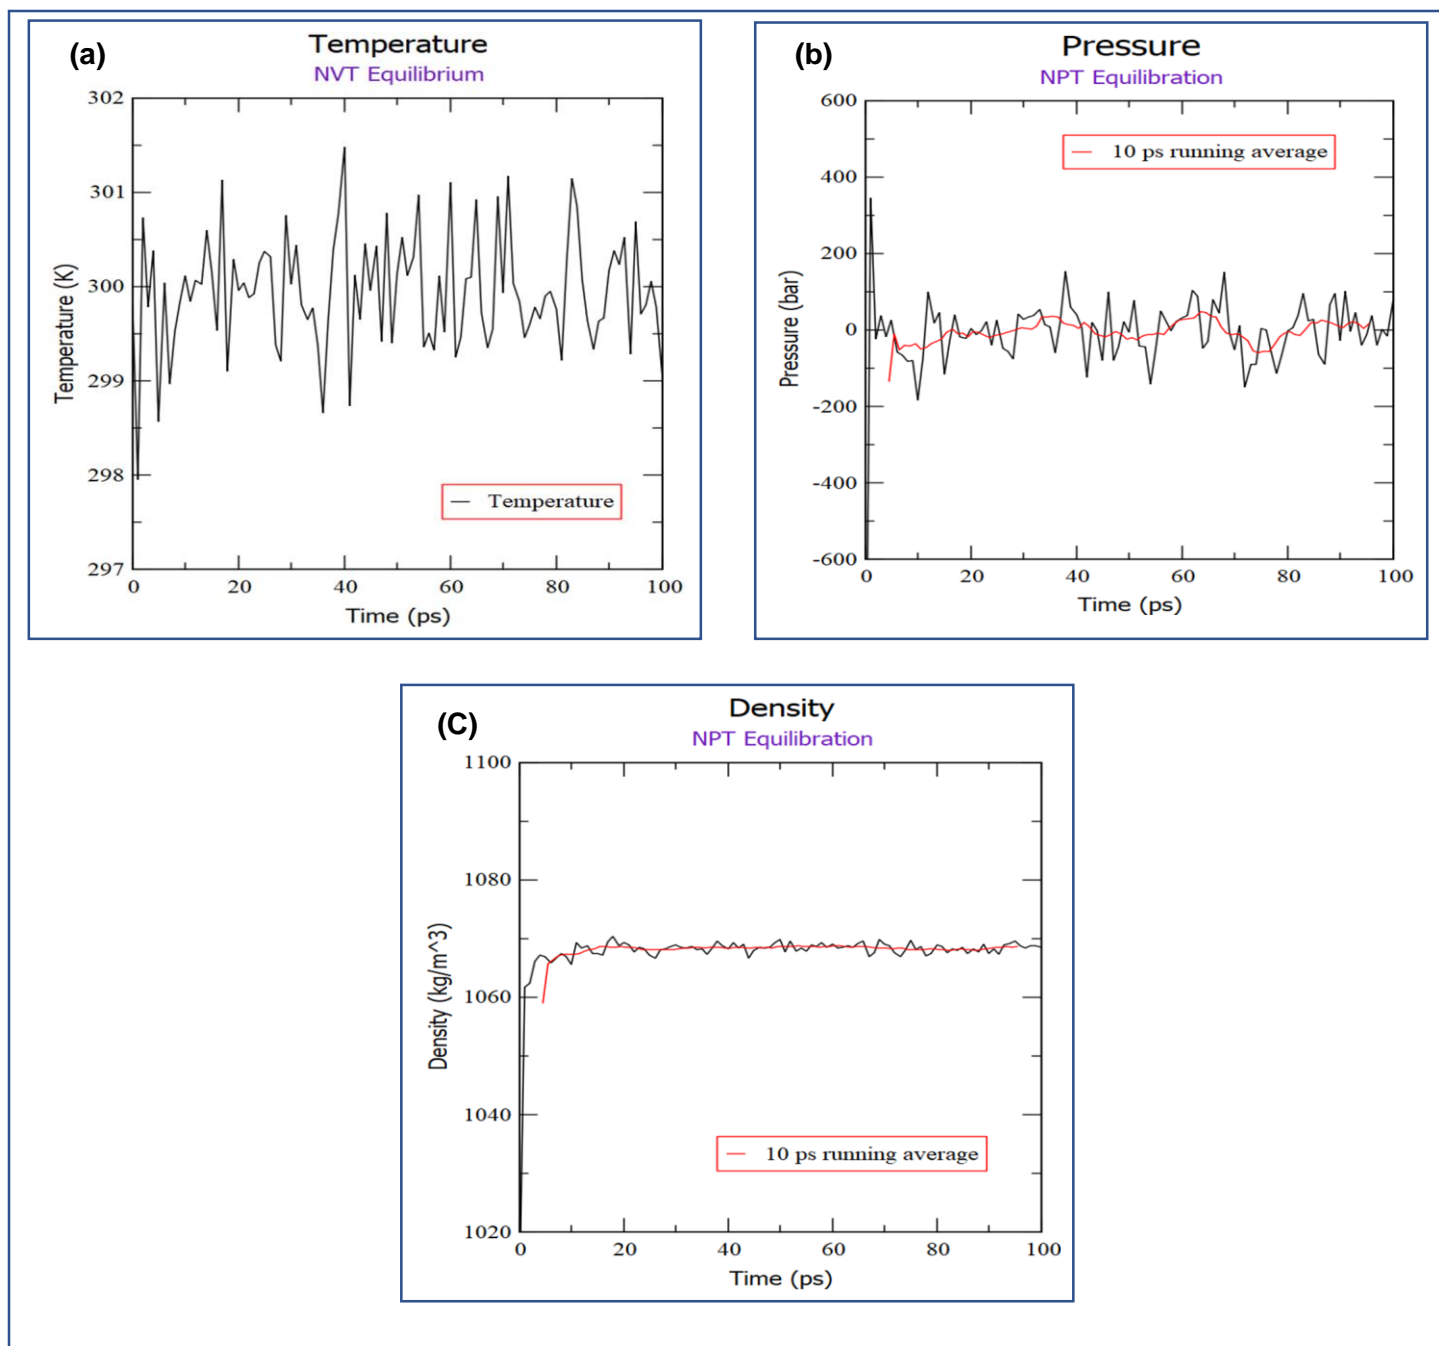

**Supplementary Figure S8.** (a) Temperature variations during simulation. Temperature had reached 300K and showed minimum fluctuations afterwards. (b) Pressure variations along with a running average with 10 ps window. (c) Density variations over 100 ps with a running average plot with 10 ps window.

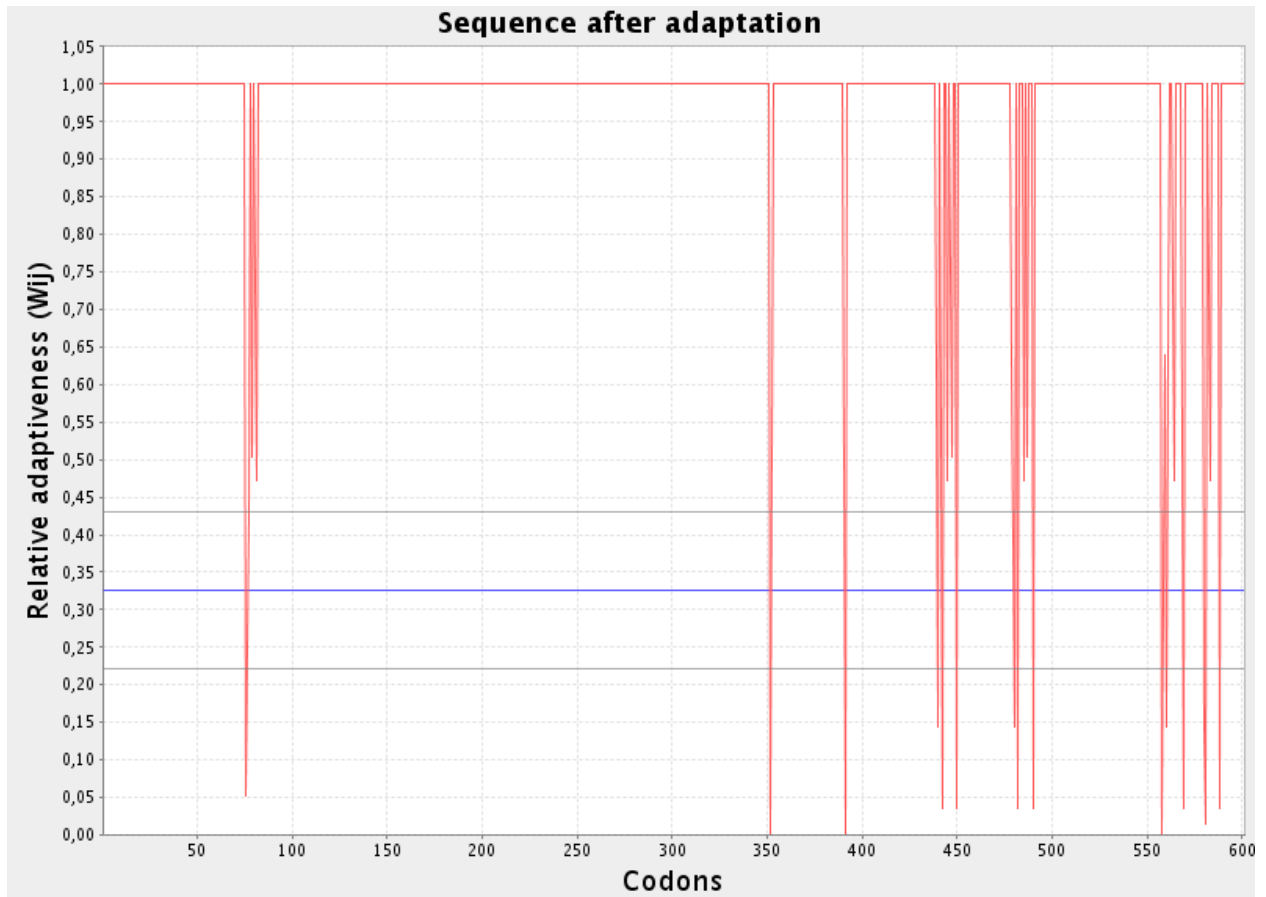

**Supplementary Figure S9.** Figure showing the codon adaptation graph of the CV vaccine.

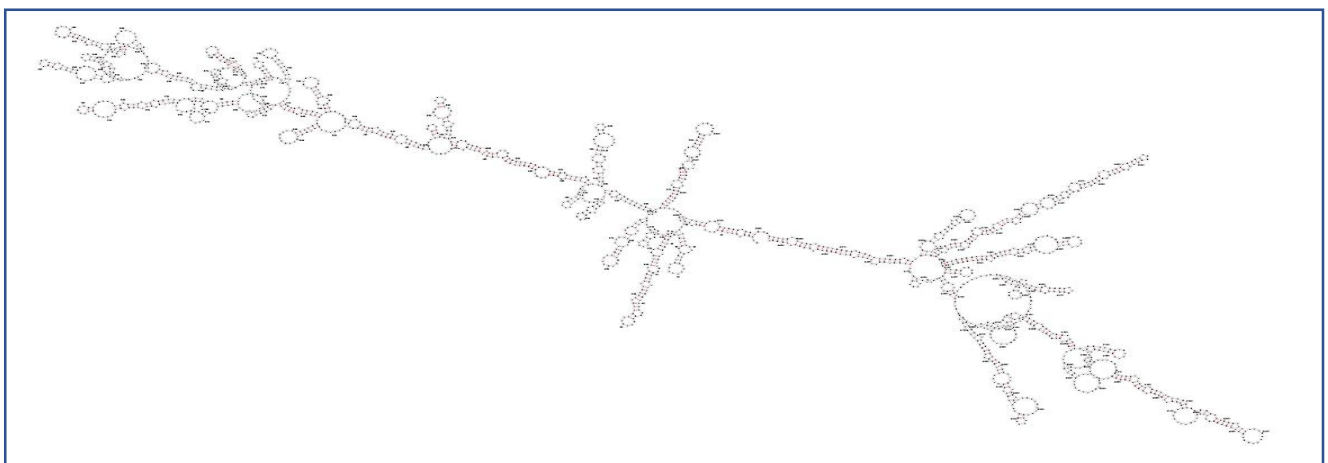

**Supplementary Figure S10.** The vaccine mRNA secondary structure predicted by RNAfold server.
